# Supplementary material for: Peers and Network Growth: Evidence from a Natural Experiment
Source: Atypon-hosted journal article supplement (doi:10.1287/mnsc.2014.2109), 2015-03-27
Supplement: mnsc.2014.2109-sm-online_appendix.pdf [file mnsc.2014.2109-sm-online_appendix.pdf]

## ONLINE APPENDIX

We begin by examining the degree to which the random assignment of second-year roommates was effective in breaking the correlation between the networks of one's roommates and one's own pretreatment networks. These two variables for the study partner network as well as the friendship network. Table A1 presents these results. As would be expected, there is no correlation between own pre-treatment networks and roommates' pre-treatment networks, either with or without the background control variables.

**TABLE A1**

| Second Year<br>Roommate Variable | Study Network<br>(Year 1) | Friend Network<br>(Year 1) |
|----------------------------------|---------------------------|----------------------------|
| Own Network                      |                           |                            |
| <b>Bivariate models</b>          | .005                      | 0.032                      |
| <b>No Controls</b>               | (0.027)                   | (0.027)                    |
| Gender / Caste / District        | -0.004<br>(0.027)         | 0.029<br>(0.027)           |

We also conducted an additional series of tests examining whether roommates' network characteristics correlated with the other background characteristics of the focal student. We find that besides a strong and negative correlation with the "Female" variable, all other variables are uncorrelated as would be expected if the random assignment was effective. The negative correlation with the "Female" variable indicates that female students at this college have slightly smaller networks, on average, than their male counterparts.

**TABLE A2**

|                         | (1)<br>Roommates' Friend Net Size | (2)<br>Roommates' Study Net Size |
|-------------------------|-----------------------------------|----------------------------------|
| SC                      | 0.296<br>(0.326)                  | 0.267<br>(0.294)                 |
| ST                      | 0.455<br>(0.463)                  | 0.499<br>(0.416)                 |
| BC-A                    | 0.041<br>(0.380)                  | -0.114<br>(0.356)                |
| BC-B                    | 0.089<br>(0.328)                  | 0.007<br>(0.314)                 |
| BC-C                    | -0.073<br>(0.443)                 | 0.039<br>(0.409)                 |
| BC-D                    | 0.093<br>(0.361)                  | 0.104<br>(0.328)                 |
| Muslim                  | 0.109<br>(0.372)                  | -0.042<br>(0.328)                |
| Own Pretreatment Grades | -0.024<br>(0.081)                 | 0.017<br>(0.078)                 |
| Female                  | -0.699**<br>(0.160)               | -0.808**<br>(0.151)              |
| Constant                | 6.767**<br>(0.276)                | 5.539**<br>(0.255)               |
| Observations            | 2113                              | 2113                             |

**Table A3.** Robustness checks examining key effects using roommates' second year networks instead of first year networks.

|                                  | (1)<br>Study<br>Indegree<br><br>(Year 3) | (2)<br>Study<br>In<br>Roomm<br>ates'<br>Networ<br>k<br><br>(Year 3) | (3)<br>Study<br>Not in<br>Roommate<br>s'<br>Network<br><br>(Year 3) | (4)<br>Study<br>Betweenne<br>ss<br><br>(Year 3) | (5)<br>Study<br>Farness<br><br>(Year 3) |
|----------------------------------|------------------------------------------|---------------------------------------------------------------------|---------------------------------------------------------------------|-------------------------------------------------|-----------------------------------------|
| Roommates' Study Net<br>(Year 2) | 0.017**<br>(0.006)                       | 0.163**<br>(0.052)                                                  | 0.016**<br>(0.005)                                                  | 85.339**<br>(31.430)                            | -0.024**<br>(0.007)                     |
| Own Study Net (Year 1)           | 0.012**<br>(0.004)                       | 0.008<br>(0.024)                                                    | 0.001<br>(0.004)                                                    | 73.558<br>(62.065)                              | -0.002<br>(0.003)                       |
| Own Study Net (Year 2)           | 0.029**<br>(0.003)                       | 0.019<br>(0.016)                                                    | 0.032**<br>(0.003)                                                  | 321.939**<br>(66.417)                           | -0.015**<br>(0.002)                     |
| Own Friends (Year 1)             | 0.006<br>(0.004)                         | 0.028<br>(0.020)                                                    | 0.002<br>(0.004)                                                    | 119.255*<br>(53.876)                            | -0.004<br>(0.003)                       |
| Own Friends (Year 2)             | 0.026**<br>(0.003)                       | 0.035<br>(0.019)                                                    | 0.027**<br>(0.003)                                                  | 133.356*<br>(57.712)                            | -0.010**<br>(0.003)                     |
| Number of Roommates              | -0.004<br>(0.003)                        | 0.093**<br>(0.012)                                                  | -0.011**<br>(0.004)                                                 | 0.333<br>(28.084)                               | 0.004<br>(0.004)                        |
| Constant                         | 1.187**<br>(0.071)                       | -3.659**<br>(0.430)                                                 | 1.186**<br>(0.057)                                                  | 2312.332**<br>(688.097)                         | 4.349**<br>(0.063)                      |
| Background controls              | Yes                                      | Yes                                                                 | Yes                                                                 | Yes                                             | Yes                                     |
| District Fixed Effects           | Yes                                      | Yes                                                                 | Yes                                                                 | Yes                                             | Yes                                     |
| Inalpha<br>Constant              | -2.541**<br>(0.113)                      | -0.637<br>(0.454)                                                   | -2.310**<br>(0.110)                                                 |                                                 |                                         |
| Observations                     | 2113                                     | 2113                                                                | 2113                                                                | 2113                                            | 2113                                    |
| Adusted R2                       |                                          |                                                                     |                                                                     | 0.073                                           | 0.089                                   |
